# Supplementary material for: Sequencing of idiopathic pulmonary fibrosis-related genes reveals independent single gene associations
Source: HighWire-hosted journal article supplement (doi:10.1136/bmjresp-2014-000057), 2014-12-01
Supplement: bmjresp-2014-000057supp.pdf [file bmjresp-2014-000057supp.pdf]

Supplemental Table 1: Minor Allele Frequency of Common Variants

| Gene          | cDNA Change | Mutation | IPF<br>(n=132)<br>[n (MAF)] | COPD<br>(n=192)<br>[n (MAF)] | ESP<br>[MAF]       | dbSNP<br>Number |
|---------------|-------------|----------|-----------------------------|------------------------------|--------------------|-----------------|
| <i>SFTPA2</i> | c.271G>C    | A91P     | 29 (11%) <sup>+</sup>       | 69 (18%) <sup>+</sup>        | 15%                | rs17886395      |
|               | c.667C>A    | Q223K    | 41 (16%) <sup>o</sup>       | 69 (18%)*                    | 25% <sup>o*</sup>  | rs1965708       |
| <i>SFTPC</i>  | c.413C>A    | T138N    | 63 (24%)                    | 108 (28%)                    | 27%                | rs4715          |
|               | c.557G>A    | S186N    | 66 (25%)                    | 123 (32%)                    | 33%                | rs1124          |
| <i>ABCA3</i>  | c.1059C>T   | F353F    | 22 (8.3%)                   | 36 (9.4%)                    | 9.8%               | rs13332514      |
|               | c.1755C>G   | P585P    | 48 (18%)                    | 60 (15.6%)                   | 19.8%              | rs323043        |
|               | c.4116T>C   | S1372S   | 25 (9.5%)                   | 36 (9.4%)                    | 8.5%               | rs149532        |
| <i>TERT</i>   | c.835G>A    | A279T    | 4 (1.5%)                    | 7 (1.8%)                     | 3%                 | rs61748181      |
| <i>MUC5B</i>  | c.16306G>A  | V5436M   | 2<br>(0.8%) <sup>++oo</sup> | 19 (5%) <sup>++</sup>        | 3.2% <sup>oo</sup> | rs55657020      |

<sup>+</sup> IPF vs COPD: p=0.015

<sup>o</sup> IPF vs ESP: p<0.001

\* COPD vs ESP: p=0.001

<sup>++</sup> IPF vs COPD: p=0.003

<sup>oo</sup> IPF vs ESP: p=0.02

all other comparisons, p>0.05

For Supplemental Table 1, the racial distribution of these variants could not be calculated since these allele frequencies were based upon pooled samples. Thus, all subjects in each cohort were compared with the combined frequencies of the African and European descent individuals in the ESP.

Supplemental Table 2: IPF-associated mutations and *MUC5B* rs35705950 genotype

| Gene          | Mutation    | <i>MUC5B</i> rs35705950 genotype |
|---------------|-------------|----------------------------------|
| <i>SFTPA2</i> | V178M       | G/G                              |
| <i>SFTPC</i>  | I73T        | G/G                              |
|               | I73T        | G/T                              |
|               | I73T        | G/T                              |
|               | L110R       | G/T                              |
|               | A112T       | G/G                              |
| <i>ABCA3</i>  | E292V/E292V | G/G                              |
|               | E292V       | G/G                              |
|               | E292V       | G/T                              |
| <i>TERT</i>   | R108P       | G/T                              |
|               | L332F       | G/G                              |
|               | H592R       | G/T                              |
|               | P704S       | G/T                              |
|               | P704S       | G/T                              |
